# Supplementary material
Source: PubMed Central journal article supplement (PMC3552009)
Supplement: NIHMS423699-supplement-1.pdf [file NIHMS423699-supplement-1.pdf]

# Supplementary Figure 1

**A**

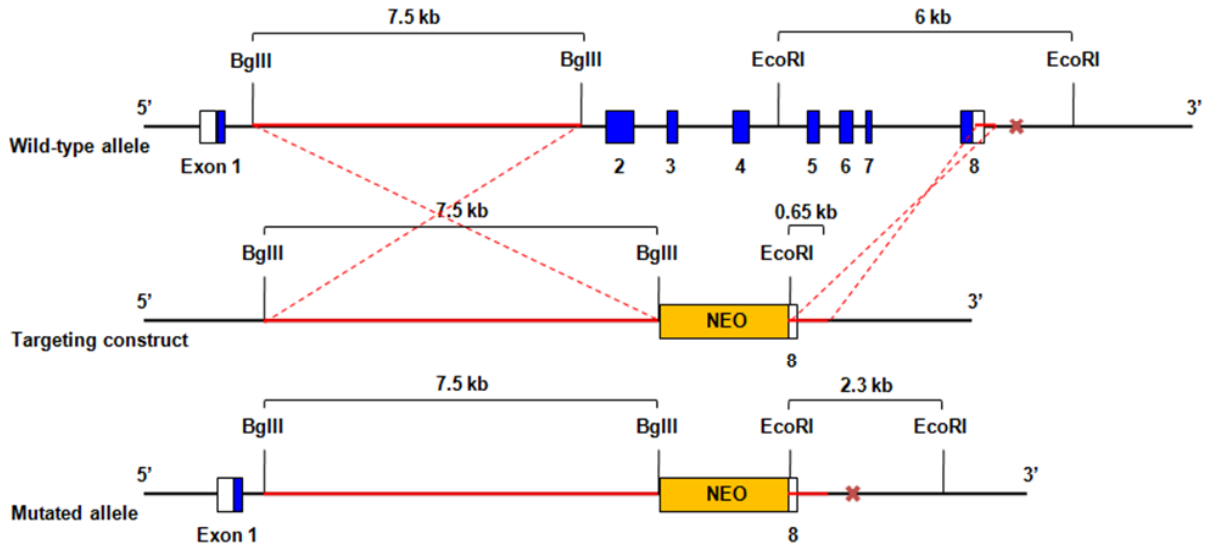

**B**

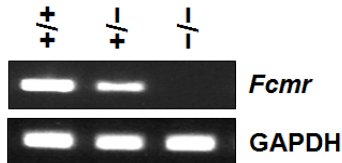

**C**

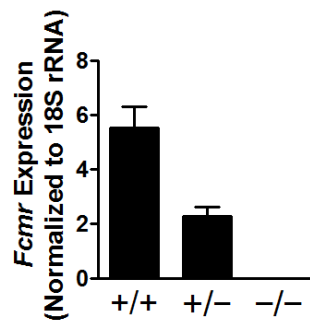

**Supplementary Figure 1. Establishment of *Fcgr1*<sup>-/-</sup> mice.** (A) A schematic diagram of the wild-type allele, the targeting construct, and the mutated allele. (B-C) PCR (B) and real-time PCR (C) analyses show the knock-out of *Fcgr1* gene using spleen cells from *Fcgr1* homozygous mutant mice and heterozygous or wild-type littermate mice. Real-time PCR data represent mean  $\pm$  SD from three experiments.

## Supplementary Figure 2

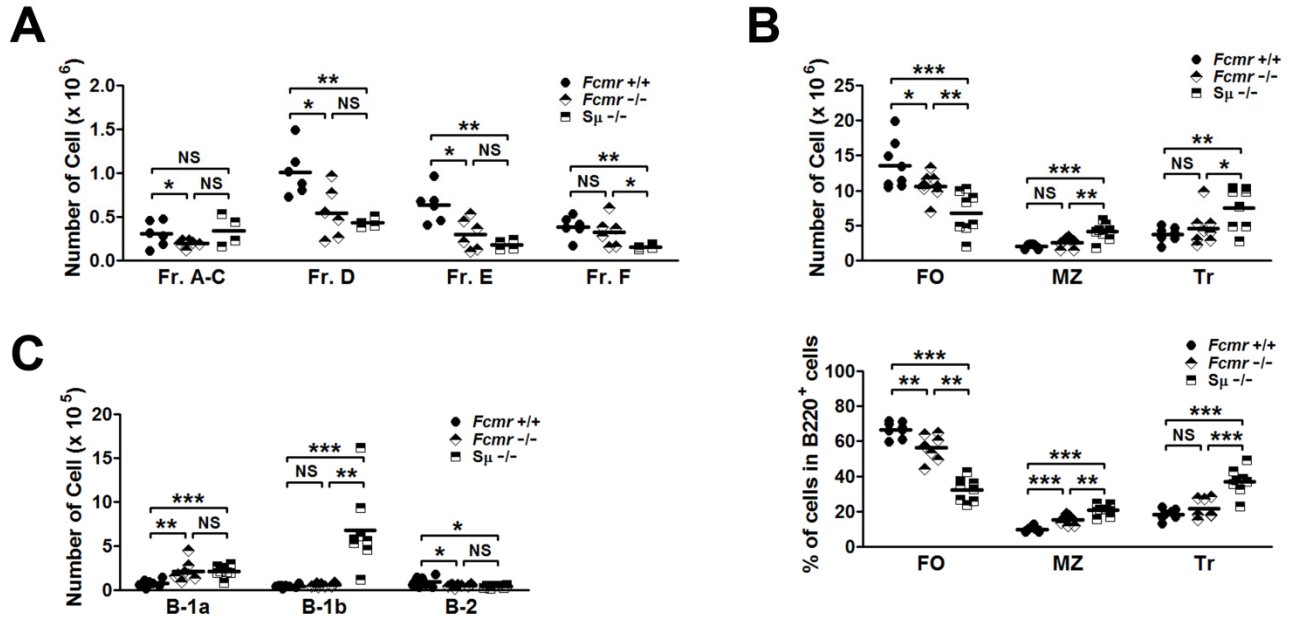

**Supplementary Figure 2. *Fcμr*<sup>-/-</sup> and *Sμ*<sup>-/-</sup> mice exhibit similar B cell deficiencies.** BM (A), spleen (B) and peritoneal cells (C) from 3 month-old mice of each strain were analyzed by flow cytometry. Data are absolute cell numbers of multiple mice. Each symbol represents a mouse. \**p* < 0.05, \*\**p* < 0.01, \*\*\**p* < 0.005.

## Supplementary Figure 3

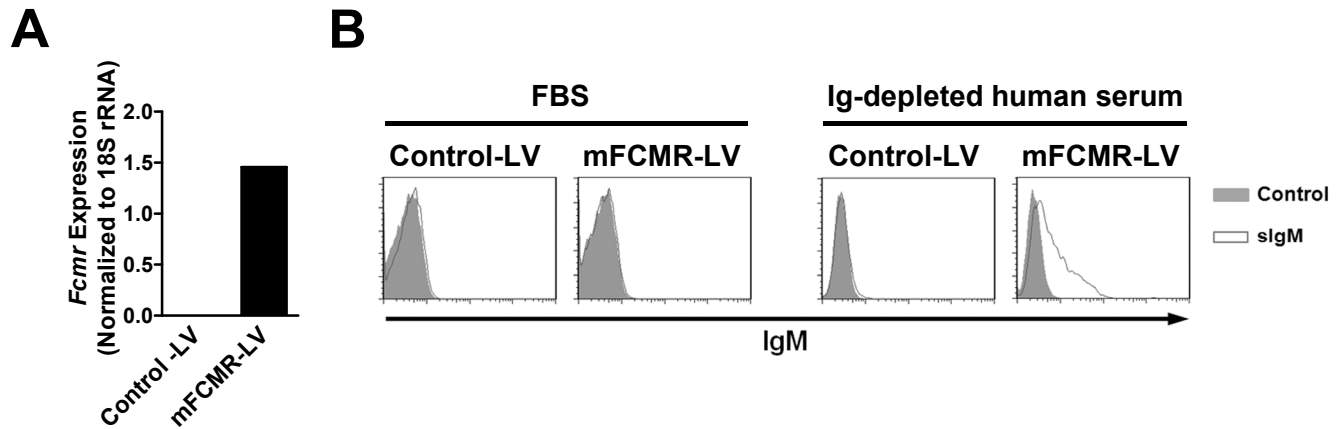

**Supplementary Figure 3. IgM binds to FCMR.** (A) The expression levels of *Fcμr* mRNA in YTS cells transfected with control lentivirus (Control-LV) or lentivirus containing the full-length mouse *Fcμr* DNA (mFCMR-LV). (B) Transfected YTS cells were cultured in RPMI1640 containing FBS or Ig-depleted human serum. The cells were incubated with mouse IgM (mIgM), followed by staining with PE-labeled anti-IgM mAb, and were analyzed by FACS. Note that normal FBS in culture medium contains bovine IgM that blocks binding of mouse IgM to the FCMR (left side).
